# Supplementary material
Source: PubMed Central journal article supplement (PMC2946174)
Supplement: NIHMS225970-supplement-2.pdf [file NIHMS225970-supplement-2.pdf]

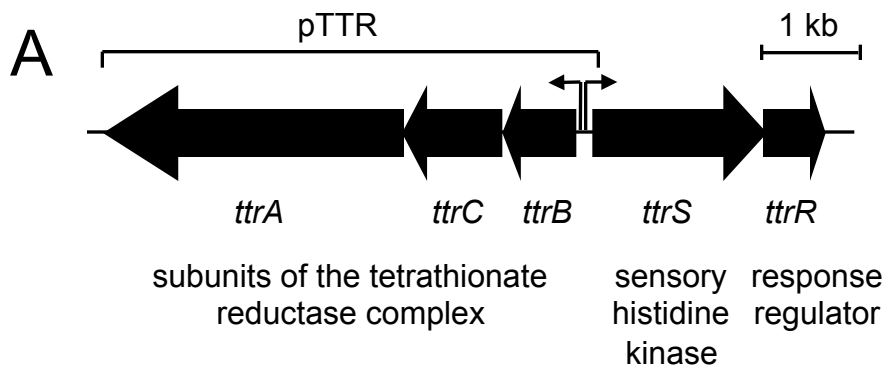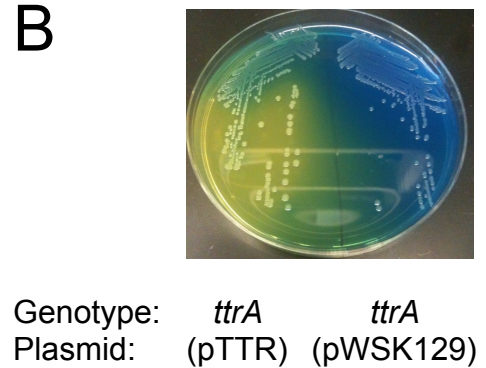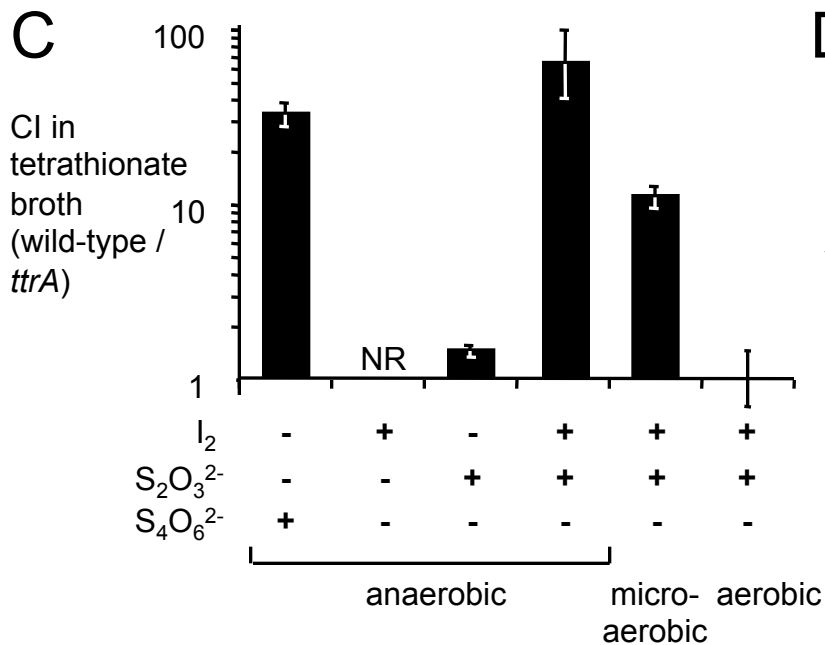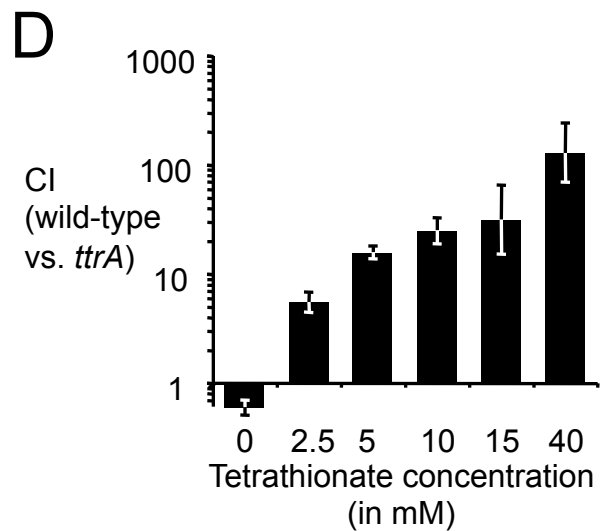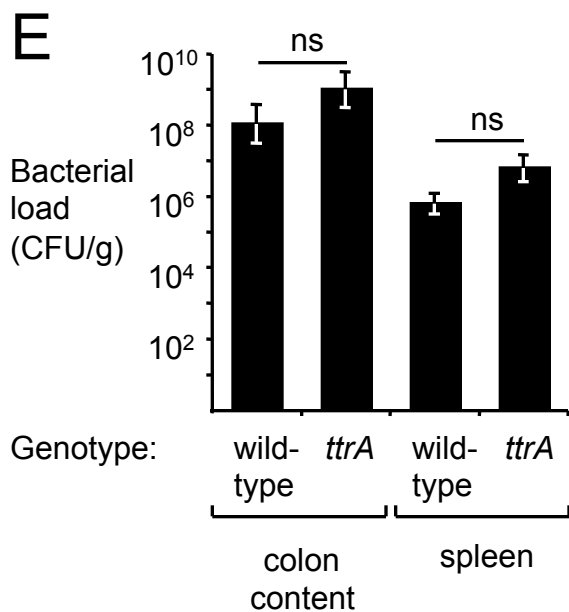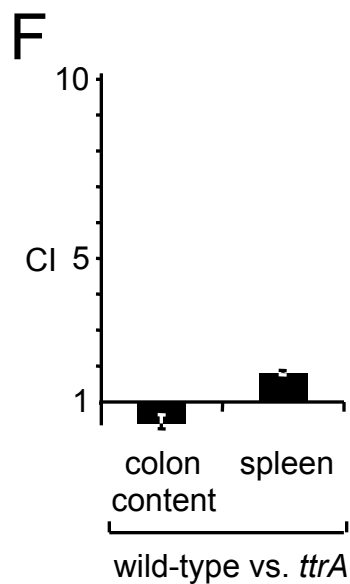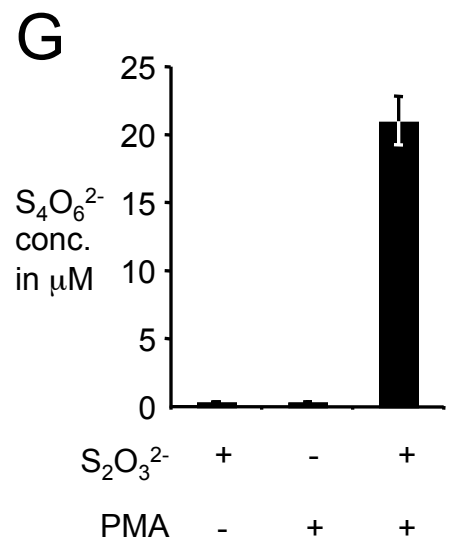

**Figure S1:** (A) Schematic drawing of the *ttr* locus in *S. Typhimurium*. Location and orientation of genes (solid arrows) and promoters (arrow heads) are indicated. The DNA region carried by plasmid pTTR is indicated above the graph. Functions of genes are indicated below the graph. (B) Growth of the *S. Typhimurium ttrA* mutant (SW661) carrying a cloning vector (pWSK129) or the cloned *ttrBCA* genes (pTTR) on tetrathionate agar plates. Development of a yellow color indicates a decrease in pH due to tetrathionate respiration, which was observed for the *ttrA* mutant complemented with pTTR. (C) Competitive growth of the *S. Typhimurium* wild-type (IR715) and a *ttrA* mutant (SW661) in the presence (+) or absence (-) of iodine ( $I_2$ ), thiosulfate ( $S_2O_3^{2-}$ ), or tetrathionate ( $S_4O_6^{2-}$ ). Growth conditions (aerobic, microaerobic, or anaerobic) are indicated. Bars represent geometric means ( $n=3$ ) of competitive indices (CI)  $\pm$  standard error. NR: no bacteria recovered. (D) Competitive growth of the *S. Typhimurium* wild-type (IR715) and a *ttrA* mutant (SW661) under anaerobic conditions in the presence of the indicated concentrations of tetrathionate ( $S_4O_6^{2-}$ ). Bars represent geometric means ( $n=3$ ) of competitive indices (CI)  $\pm$  standard error. (E and F) Contribution of tetrathionate respiration to *S. Typhimurium* virulence in the mouse model of typhoid fever in which intestinal inflammatory infiltrates are dominated by mononuclear cells while neutrophils are scars (data not shown). (E) Bacterial numbers recovered from the spleen and colon contents of groups of mice (C57BL/6) 4 days after infection with the *S. Typhimurium* wild-type strain (IR715;  $n=3$ ) or a *ttrA* mutant (SW661;  $n=4$ ). ns, not significant. (F) Recovery of bacteria from the spleen and colon contents of groups of mice (C57BL/6,  $n=3$ ) four days after infection with a 1:1 mixture of the *S. Typhimurium* wild type (IR715) and a *ttrA* mutant (SW661). Bars represent geometric means of competitive indices (CI)  $\pm$  standard error. (G) Oxidation of thiosulfate to tetrathionate by PMA-treated human blood leukocytes. Bars represent geometric means ( $n=3$ )  $\pm$  standard error.

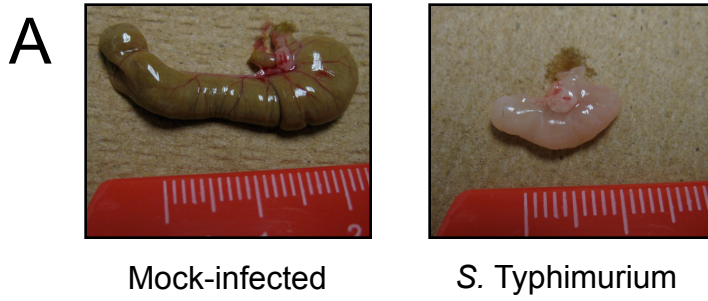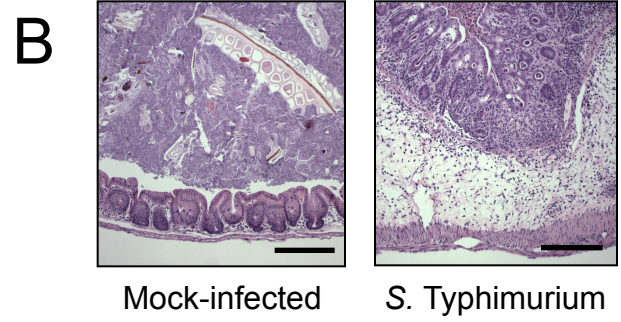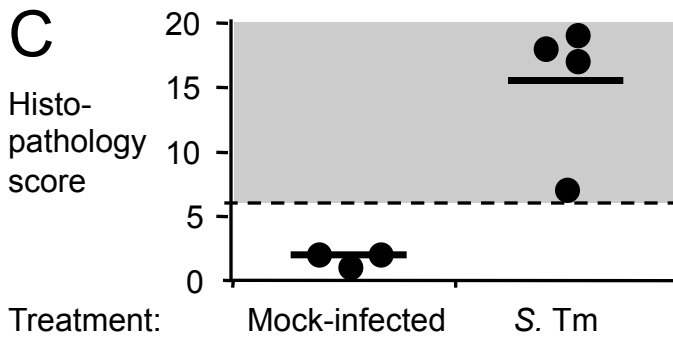

| Combined score | Description           |
|----------------|-----------------------|
| >8             | Severe inflammation   |
| 6-8            | Moderate inflammation |
| 3-5            | Mild inflammation     |
| 0-2            | normal                |

**D**

| Score | Infiltration by PMNs* | Infiltration by mononuclear cells* | Submucosal edema   | Epithelial damage | Exudate               |
|-------|-----------------------|------------------------------------|--------------------|-------------------|-----------------------|
| 0     | No changes (0-5)      | No changes (0-5)                   | No changes         | No changes        | No changes            |
| 1     | 6-20                  | 5-10                               | Detectable (<10%)  | Desquamation      | Slight accumulation   |
| 2     | 21-60                 | 10-20                              | Mild (10%-20%)     | Mild erosion      | Mild accumulation     |
| 3     | 61-100                | 20-40                              | Moderate (20%-40%) | Marked erosion    | Moderate accumulation |
| 4     | >100                  | >40                                | Marked (>40%)      | Ulceration        | Marked accumulation   |

\* Number of cells per high power field (400x)

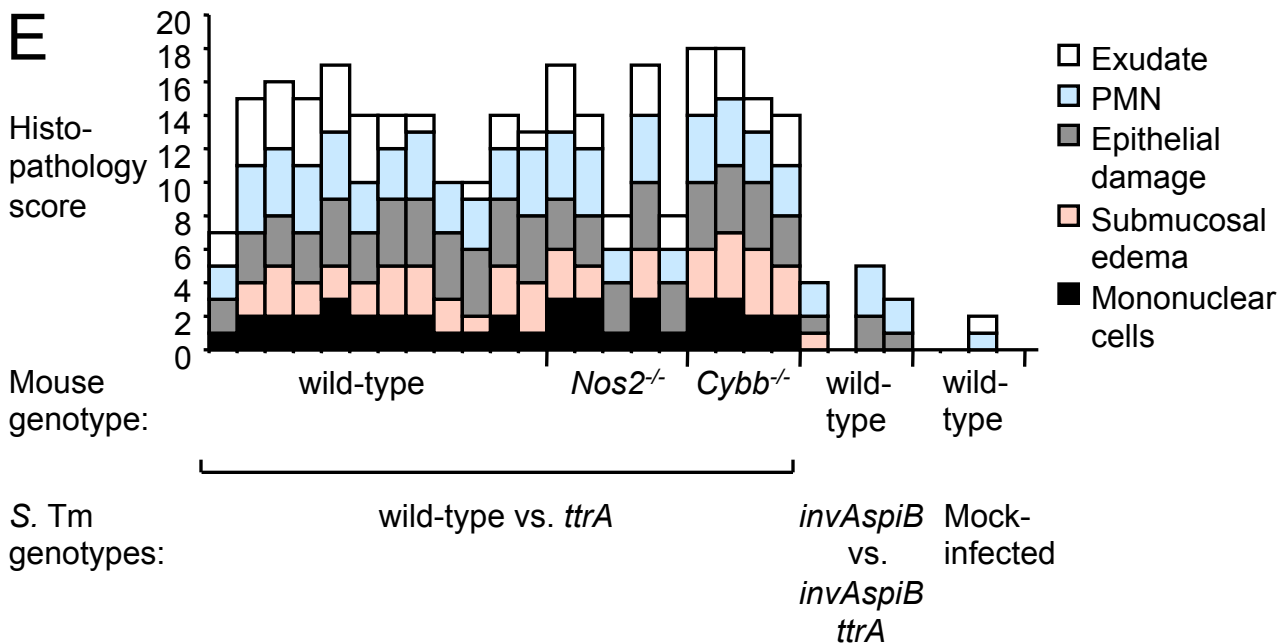

**Figure S2: Evaluation of cecal inflammation in the mouse colitis model 4 days after *S. Typhimurium* infection.** Gross pathological (A) and histopathological (B) appearance of the cecum from mock-infected (left panels) or *S. Typhimurium* (*S. Tm*)-infected mice (right panels). Scale bars represents 400  $\mu\text{m}$  (C) Blinded histopathology scoring of mice used for experiments shown in Figure 1B, C and D. Data are shown as averages for each group (bars) and as scores for each individual animal (filled circles). (D) Chart indicating scoring criteria for blinded examination of H&E stained sections from the cecum. (E) Detailed view of the histopathological scoring for each individual animal shown in Figure 2B.

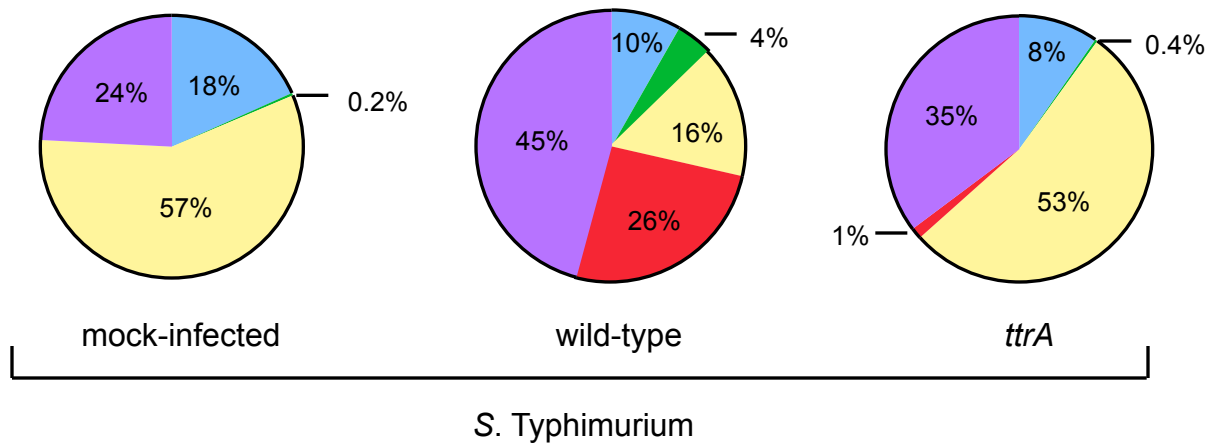

- *Clostridiales*
- *Lactobacillales / Bacillales*
- *Bacteroidetes / Actinobacteria*
- *Salmonella*
- undetermined

**Supplementary Figure S3: Detailed analysis of bacterial composition of the cecal microbiota in the mouse colitis model 4 days after *S. Typhimurium* infection.** 16S gene copy number in the cecum of animals depicted in Figure 3E was determined by real-time PCR. Animals were mock-infected (n=4), or infected with the wild-type (IR715; n=6) or the *ttrA* mutant (SW661; n=6) Data shown are the geometric mean of the fraction of each population in the entire bacterial microbiota (*Eubacteria*).
